# Supplementary material for: An ‘all pigment’ model of excitation quenching in LHCII
Source: Royal Society of Chemistry journal article supplement (doi:10.1039/c5cp01905b), 2015-01-01
Supplement: c5cp01905b1.pdf [file c5cp01905b1.pdf]

## An 'all pigment' model of excitation quenching in LHCII

Jevgenij Chmeliov,<sup>a,b</sup> William P. Bricker,<sup>c</sup> Cynthia Lo,<sup>c</sup> Elodie Jouin,<sup>d</sup> Leonas Valkunas,<sup>a,b</sup>  
Alexander V. Ruban,<sup>d</sup> and Christopher D. P. Duffy<sup>\*d</sup>

<sup>a</sup> Department of Theoretical Physics, Faculty of Physics, Vilnius University, Saulėtekio Ave. 9, LT-10222 Vilnius, Lithuania

<sup>b</sup> Institute of Physics, Center for Physical Sciences and Technology, Goštauto 11, LT-01108 Vilnius, Lithuania

<sup>c</sup> Department of Energy, Environmental and Chemical Engineering, Washington University in St. Louis, 1 Brookings Drive, Saint Louis, MO 63130-4899, USA

<sup>d</sup> The School of Biological and Chemical Sciences, Queen Mary, University of London, Mile End Road, London E1 4NS, U.K.

\*Corresponding author: c.duffy@qmul.ac.uk

**Electronic Supplementary Information**

**Table S1** Inter-pigment hopping times (in ps), obtained assuming Förster regime and two domains of strongly-coupled Chls. Inter-Chl couplings were taken from Müh et al.<sup>1</sup> Values longer than 1 ns are denoted as "Inf".

| Pigments          | Chl b 601 | Chl a 602 | Chl a 603 | Chl a 604 | Chl b 605 | Chl b 606 | Chl b 607 | Chl b 608 | Chl b 609 | Chl a 610-611-612 | Chl a 613-614 | Lut 620 | Lut 621 | Vio 622 | Neo 623 |
|-------------------|-----------|-----------|-----------|-----------|-----------|-----------|-----------|-----------|-----------|-------------------|---------------|---------|---------|---------|---------|
| Chl b 601         | –         | 26.3      | Inf       | Inf       | 335.6     | 92.4      | 137.4     | 152.2     | 21.3      | 139.1             | Inf           | Inf     | Inf     | Inf     | Inf     |
| Chl a 602         | 2.7       | –         | 2.5       | 19.5      | Inf       | 119.5     | 26.7      | 25.0      | 10.2      | 22.1              | 228.0         | Inf     | Inf     | Inf     | Inf     |
| Chl a 603         | 275.4     | 1.6       | –         | 385.1     | Inf       | 369.0     | 49.7      | 104.2     | 2.3       | 17.1              | 41.2          | Inf     | Inf     | Inf     | Inf     |
| Chl a 604         | 964.5     | 10.8      | 332.3     | –         | 865.6     | 1.5       | 3.9       | 129.3     | Inf       | 53.0              | 85.3          | Inf     | Inf     | Inf     | Inf     |
| Chl b 605         | 450.5     | Inf       | Inf       | Inf       | –         | 6.3       | 146.3     | 163.5     | Inf       | Inf               | Inf           | Inf     | Inf     | Inf     | Inf     |
| Chl b 606         | 83.8      | Inf       | Inf       | 23.6      | 4.3       | –         | 4.0       | 44.7      | 88.7      | Inf               | Inf           | Inf     | Inf     | Inf     | Inf     |
| Chl b 607         | 56.8      | 108.1     | 313.5     | 28.2      | 45.0      | 1.8       | –         | 22.3      | 30.7      | Inf               | 522.1         | Inf     | Inf     | Inf     | Inf     |
| Chl b 608         | 59.9      | 96.4      | 625.3     | 899.2     | 47.9      | 19.4      | 21.3      | –         | 1.4       | 17.4              | Inf           | Inf     | Inf     | Inf     | Inf     |
| Chl b 609         | 30.0      | 141.8     | 49.2      | Inf       | Inf       | 138.1     | 104.6     | 5.1       | –         | Inf               | Inf           | Inf     | Inf     | Inf     | Inf     |
| Chl a 610-611-612 | 5.3       | 5.6       | 6.8       | 21.5      | Inf       | 745.7     | 116.2     | 1.4       | 296.7     | –                 | 14.4          | Inf     | Inf     | Inf     | Inf     |
| Chl a 613-614     | 83.4      | 94.2      | 23.0      | 55.0      | Inf       | 392.1     | 56.1      | 235.4     | 774.1     | 22.0              | –             | Inf     | Inf     | Inf     | Inf     |
| Lut 620           | Inf       | 65.8              | 505.8         | –       | Inf     | Inf     | Inf     |
| Lut 621           | Inf       | 343.7     | 22.5      | 89.9      | Inf       | 698.2     | 751.0     | Inf       | Inf       | Inf               | Inf           | Inf     | –       | Inf     | Inf     |
| Vio 622           | Inf               | 272.5         | Inf     | Inf     | –       | Inf     |
| Neo 623           | Inf       | Inf       | Inf       | 174.7     | Inf       | 186.8     | Inf       | 288.3     | Inf       | Inf               | Inf           | Inf     | Inf     | Inf     | –       |

<sup>1</sup> F. Müh, M.E.A. Madjet and T. Renger, J. Phys. Chem. B, 2010, 114, 13517–13535.

**Table S2** Inter-pigment hopping times (in ps), obtained assuming Förster regime and two domains of strongly-coupled Chls. Inter-Chl couplings were taken from our MNDO-CAS-CI calculations. Values longer than 1 ns are denoted as "Inf".

| Pigments          | Chl b 601 | Chl a 602 | Chl a 603 | Chl a 604 | Chl b 605 | Chl b 606 | Chl b 607 | Chl b 608 | Chl b 609 | Chl a 610-611-612 | Chl a 613-614 | Lut 620 | Lut 621 | Vio 622 | Neo 623 |
|-------------------|-----------|-----------|-----------|-----------|-----------|-----------|-----------|-----------|-----------|-------------------|---------------|---------|---------|---------|---------|
| Chl b 601         | –         | 26.8      | Inf       | Inf       | Inf       | 147.0     | 476.7     | 460.9     | 57.9      | Inf               | Inf           | Inf     | Inf     | Inf     | Inf     |
| Chl a 602         | 2.7       | –         | 1.7       | 17.5      | Inf       | 97.8      | 38.5      | 39.3      | 17.8      | 8.4               | 26.8          | Inf     | Inf     | Inf     | Inf     |
| Chl a 603         | 236.8     | 1.1       | –         | 15.7      | Inf       | 65.5      | Inf       | 140.9     | 3.0       | 10.7              | 24.9          | Inf     | Inf     | Inf     | Inf     |
| Chl a 604         | Inf       | 9.7       | 13.5      | –         | Inf       | 1.2       | 7.2       | 327.6     | 341.5     | 35.4              | 90.4          | Inf     | Inf     | Inf     | Inf     |
| Chl b 605         | Inf       | Inf       | Inf       | Inf       | –         | 4.0       | Inf       | 224.1     | Inf       | Inf               | Inf           | Inf     | Inf     | Inf     | Inf     |
| Chl b 606         | 133.3     | 869.4     | 906.1     | 19.8      | 2.7       | –         | 5.8       | 123.9     | 2.1       | Inf               | Inf           | Inf     | Inf     | Inf     | Inf     |
| Chl b 607         | 197.0     | 156.1     | Inf       | 52.7      | 587.4     | 2.6       | –         | 40.0      | 19.1      | 923.3             | Inf           | Inf     | Inf     | Inf     | Inf     |
| Chl b 608         | 181.3     | 151.6     | 846.1     | Inf       | 65.7      | 53.8      | 38.1      | –         | 4.2       | 18.1              | Inf           | Inf     | Inf     | Inf     | Inf     |
| Chl b 609         | 81.7      | 245.8     | 64.9      | Inf       | Inf       | 3.2       | 65.2      | 14.9      | –         | Inf               | Inf           | Inf     | Inf     | Inf     | Inf     |
| Chl a 610-611-612 | 48.9      | 2.2       | 4.1       | 15.1      | 323.9     | 65.0      | 71.9      | 1.4       | 317.5     | –                 | 4.4           | Inf     | Inf     | Inf     | Inf     |
| Chl a 613-614     | 168.3     | 11.9      | 13.3      | 57.5      | Inf       | 964.1     | 176.4     | 625.7     | Inf       | 6.9               | –             | Inf     | Inf     | Inf     | Inf     |
| Lut 620           | Inf       | 60.4              | 489.9         | –       | Inf     | Inf     | Inf     |
| Lut 621           | Inf       | 343.7     | 22.5      | 89.9      | Inf       | 697.8     | 750.6     | Inf       | Inf       | Inf               | Inf           | Inf     | –       | Inf     | Inf     |
| Vio 622           | Inf               | 251.3         | Inf     | Inf     | –       | Inf     |
| Neo 623           | Inf       | Inf       | Inf       | 174.6     | Inf       | 187.3     | Inf       | 288.8     | Inf       | Inf               | Inf           | Inf     | Inf     | Inf     | –       |
